# Supplementary material for: Deciphering the impact of PROM1 alternative splicing on human photoreceptor development and maturation
Source: Cell Death Dis. 2024 Oct 1;15(10):721. doi: 10.1038/s41419-024-07105-7 (PMC11445533; doi:10.1038/s41419-024-07105-7)
Supplement: Supplementary file 2 — Table S1_1 [file 41419_2024_7105_MOESM2_ESM.xlsx]

## Sheet: Sample Summary
Summary of neural-retinal, RPE and non-retinal samples used for RNA isolation.
	HDBR Sample ID	Age (PCW)	Tissue		HDBR Sample ID	Age (PCW)	Tissue		HDBR Sample ID	Age (PCW)	Tissue		HDBR Sample ID	Age (PCW)	Tissue		HDBR Sample ID	Age (PCW)	Tissue
	13870	7.5 PCW	Retina		14808	9 PCW	RPE		13149	9 PCW	Cornea		13149	9 PCW	Lens		13149	9 PCW	Vitreous
	13924	7.5 PCW	Retina		13305	9 PCW	RPE		13305	9 PCW	Cornea		13305	9 PCW	Lens		13305	9 PCW	Vitreous
	13876	7.5 PCW	Retina		13159	9 PCW	RPE		13159	9 PCW	Cornea		12751	9 PCW	Lens		12751	9 PCW	Vitreous
	14591	8 PCW	Retina		14616	12 PCW	RPE		14170	12 PCW	Cornea		14170	12 PCW	Lens		14170	12 PCW	Vitreous
	13305-1	9 PCW	Retina		14170	12 PCW	RPE		14375	12 PCW	Cornea		14680	12 PCW	Lens		14680	12 PCW	Vitreous
	13305-2	9 PCW	Retina		13343	12 PCW	RPE		14210	12 PCW	Cornea		14375	12 PCW	Lens		14375	12 PCW	Vitreous
	14201	9 PCW	Retina		13823	18 PCW	RPE		13823	18 PCW	Cornea		13823	18 PCW	Lens		13823	18 PCW	Vitreous
	13721	10 PCW	Retina		13388	18 PCW	RPE		12663	18 PCW	Cornea		13388	18 PCW	Lens		13388	18 PCW	Vitreous
	14615	10 PCW	Retina		12663	18 PCW	RPE		13388	18 PCW	Cornea		12663	18 PCW	Lens		12663	18 PCW	Vitreous
	13343	12 PCW	Retina		G170020300365	Adult - 88 yo	RPE		G170020300365	Adult - 88 yo	Cornea		G170020300365	Adult - 88 yo	Lens		G170020300365	Adult - 88 yo	Vitreous
	14210	12 PCW	Retina		G170019300246Z	Adult - 86 yo	RPE		G170019300246Z	Adult - 86 yo	Cornea		G170019300246Z	Adult - 86 yo	Lens		G170020301595M	Adult - 89 yo	Vitreous
	14170	12 PCW	Retina		G170020301595M	Adult - 89 yo	RPE		G170020301595M	Adult - 89 yo	Cornea		G170020301595M	Adult - 89 yo	Lens		G1700203014639	Adult - 90 yo	Vitreous
	14184	12 PCW	Retina
	14423	12 PCW	Retina
	14466	12 PCW	Retina
	14616	12 PCW	Retina		Abbreviations: PCW, Post-conception week; yo, year old.
	14256	13 PCW	Retina
	14154	13 PCW	Retina
	15176	13 PCW	Retina
	13808	14 PCW	Retina
	14408	14 PCW	Retina
	14510-1	14 PCW	Retina
	14510-2	14 PCW	Retina
	14429	14 PCW	Retina
	14189	14 PCW	Retina
	14393	14 PCW	Retina
	15440	15 PCW	Retina
	15440-1	15 PCW	Retina
	14156	15 PCW	Retina
	13411	16 PCW	Retina
	14149	16 PCW	Retina
	13402	16 PCW	Retina
	13352	17 PCW	Retina
	13508	17 PCW	Retina
	14409	17 PCW	Retina
	13388	18 PCW	Retina
	13823	18 PCW	Retina
	13378	21 PCW	Retina
	G170020300365	Adult - 88 yo	Retina
	G170020301595M	Adult - 89 yo	Retina
	G1700203014639	Adult - 90 yo	Retina
