# Supplementary material for: Deciphering the impact of PROM1 alternative splicing on human photoreceptor development and maturation
Source: Cell Death Dis. 2024 Oct 1;15(10):721. doi: 10.1038/s41419-024-07105-7 (PMC11445533; doi:10.1038/s41419-024-07105-7)
Supplement: Supplementary file 3 — Table S1_2 [file 41419_2024_7105_MOESM3_ESM.xlsx]

## Sheet: Primer sequences
List of primers used for the RT-PCR or qRT-PCR analyses.
	Target	Direction	Sequence (5’ à3’)
	ARL13B	Forward	GGGAACCCCTAAAGTCACTAGAC
		Reverse	TGGTCATTGTGCTTCTTGCTG
	ABCA4	Forward	CATCCTGTTCCACCACCTCA
		Reverse	CTGTGTCCTCCAACATGGCT
	ARR3	Forward	TCTCCCCAGAAAAGGCTCAAC
		Reverse	TTGTCCCCTAGCTTGTGCAG
	GAPDH	Forward	TGCACCACCACCTGCTTAGC
		Reverse	GGCATGGACTGTGGTCATGAG
	GNAT1	Forward	TCAGCATCTGTTTCCCGGAC
		Reverse	AGGTCTCAGGGTGACTGACA
	OPN1SW	Forward	ATACCGCAGCGAGTCCTATAC
		Reverse	GATCCTACCATCACAACCAC
	OPN1MW	Forward	CATCTTTGGTTGGAGCAGGTACT
		Reverse	TCTCTGCCTTCTGGGTGGAT
	OPN1LW	Forward	GCCTACTTTGCCAAAAGTGC
		Reverse	GATGAGACCTCCGTTTTGGA
	PCN	Forward	CACTGAAGTCGACGGTGGAA
		Reverse	TTAACTGTCCTGTCCACGGC
	PROM1, Exons 2-5	Forward	ACCCATTGGCATTCTCTTTG
		Reverse	CCACCAGAGGCATCAGAATAA
	PROM1, Exon 4	Forward	CCAGAAACTGTAATCTTAGGTCTAAAGAT
		Reverse	GGGCCAATATATATTTGATTTGCT
	PROM1, Exons 23-26	Forward	TGGTTTGGCATAGGAAAAGC
		Reverse	GCAGTTTCAACATCAGCTATCAA
	PRPH2	Forward	ACTAGCCCAGGACCCATCTT
		Reverse	GGCATTAAGCAAACGGCCAA
	PSMC1	Forward	TCTGCAGTCTCCACACACAC
		Reverse	ATGTGGCGAACGCATAGTGA
	PSMC1P1	Forward	GAGTGGTGGTCATGGTCCTG
		Reverse	GCACTGAGTGTGAGGTGTCA
	RHO	Forward	TTTGGAGGGCTTCTTTGCCA
		Reverse	CCTCGGGGATGTACCTGGAC
	TOMM20	Forward	CGACCGCAAAAGACGAAGTG
		Reverse	TGGAACACTGGTGGTGGAAG
