# Supplementary material for: Deciphering the impact of PROM1 alternative splicing on human photoreceptor development and maturation
Source: Cell Death Dis. 2024 Oct 1;15(10):721. doi: 10.1038/s41419-024-07105-7 (PMC11445533; doi:10.1038/s41419-024-07105-7)
Supplement: Supplementary file 6 — Table S1_5 [file 41419_2024_7105_MOESM6_ESM.xlsx]

## Sheet: PMOs
Phosphorodiamidate morpholino oligos sequences used in the study.
	Name	Sequence (5’à3’)
	I3E4 (PMO1)	TCTGGCTGTAGAAGTCAACGCAGGT
	E4I4 (PMO2)	AGACAAGGACTTTACCTTTAGACCT
	Standard Control Oligo (Ctrl-PMO)	CCTCTTACCTCAGTTACAATTTATA
