# Supplementary material for: Deciphering the impact of PROM1 alternative splicing on human photoreceptor development and maturation
Source: Cell Death Dis. 2024 Oct 1;15(10):721. doi: 10.1038/s41419-024-07105-7 (PMC11445533; doi:10.1038/s41419-024-07105-7)
Supplement: Supplementary file 7 — Table S1_6 [file 41419_2024_7105_MOESM7_ESM.xlsx]

## Sheet: RNA-Seq DEG
List of DEGs obtained via bulk RNA-Seq.
	ensembl_gene_id	baseMean	log2FoldChange	lfcSE	stat	pvalue	padj	hgnc_symbol	description	gene_biotype	chromosome_name	strand	start_position	end_position
	ENSG00000241506	102.69	2.75039	0.180561	15.2324	2.15388e-52	4.97159e-48	PSMC1P1	proteasome 26S subunit, ATPase 1 pseudogene 1 [Source:HGNC Symbol;Acc:HGNC:30147]	processed_pseudogene	3	1	68635705	68637024
	ENSG00000289685	53.7945	1.10151	0.173684	6.34202	2.26774e-10	2.54197e-06		novel protein	protein_coding	2	-1	95085391	95165391
	ENSG00000272702	28.7347	1.01295	0.17798	5.69135	1.26039e-08	3.79103e-05		novel transcript	lncRNA	2	1	73113018	73115907
	ENSG00000204406	1546.76	0.960073	0.157704	6.08781	1.14465e-09	6.60523e-06	MBD5	methyl-CpG binding domain protein 5 [Source:HGNC Symbol;Acc:HGNC:20444]	protein_coding	2	1	148021011	148516971
	ENSG00000290318	105.97	0.881027	0.179028	4.92116	8.60339e-07	0.00124115		novel protein	protein_coding	3	-1	49357176	49412051
	ENSG00000205038	33.2077	0.870052	0.180359	4.82401	1.40703e-06	0.00191042	PKHD1L1	PKHD1 like 1 [Source:HGNC Symbol;Acc:HGNC:20313]	protein_coding	8	1	109362461	109537207
	ENSG00000157978	683.651	0.850878	0.142444	5.97342	2.32337e-09	8.938e-06	LDLRAP1	low density lipoprotein receptor adaptor protein 1 [Source:HGNC Symbol;Acc:HGNC:18640]	protein_coding	1	1	25543606	25568886
	ENSG00000185885	3376.57	0.812652	0.142966	5.68424	1.31393e-08	3.79103e-05	IFITM1	interferon induced transmembrane protein 1 [Source:HGNC Symbol;Acc:HGNC:5412]	protein_coding	11	1	310041	315272
	ENSG00000196668	210.079	0.783101	0.156413	5.00661	5.53969e-07	0.000956682	LINC00173	long intergenic non-protein coding RNA 173 [Source:HGNC Symbol;Acc:HGNC:33791]	lncRNA	12	1	116533422	116536518
	ENSG00000196511	141.321	0.774945	0.176739	4.38469	1.1615e-05	0.00765992	TPK1	thiamin pyrophosphokinase 1 [Source:HGNC Symbol;Acc:HGNC:17358]	protein_coding	7	-1	144451941	144836395
	ENSG00000129353	2868.74	0.765083	0.166107	4.60597	4.10545e-06	0.00379048	SLC44A2	solute carrier family 44 member 2 [Source:HGNC Symbol;Acc:HGNC:17292]	protein_coding	19	1	10602457	10644557
	ENSG00000019991	428.72	0.754958	0.160466	4.70477	2.54149e-06	0.00308751	HGF	hepatocyte growth factor [Source:HGNC Symbol;Acc:HGNC:4893]	protein_coding	7	-1	81699010	81770438
	ENSG00000138646	591.91	0.74819	0.135094	5.53828	3.0546e-08	7.05064e-05	HERC5	HECT and RLD domain containing E3 ubiquitin protein ligase 5 [Source:HGNC Symbol;Acc:HGNC:24368]	protein_coding	4	1	88457119	88506163
	ENSG00000166482	3335.13	0.744922	0.136447	5.45942	4.77686e-08	0.000100236	MFAP4	microfibril associated protein 4 [Source:HGNC Symbol;Acc:HGNC:7035]	protein_coding	17	-1	19383442	19387190
	ENSG00000224729	94.8233	0.71621	0.173294	4.13291	3.582e-05	0.0183733	PCOLCE-AS1	PCOLCE antisense RNA 1 [Source:HGNC Symbol;Acc:HGNC:40430]	lncRNA	7	-1	100589402	100604206
	ENSG00000225972	125.768	0.714424	0.180574	3.95641	7.60845e-05	0.0292697	MTND1P23	MT-ND1 pseudogene 23 [Source:HGNC Symbol;Acc:HGNC:42092]	unprocessed_pseudogene	1	1	629062	629433
	ENSG00000161955	83.4409	0.706744	0.180165	3.92277	8.75372e-05	0.0325893	TNFSF13	TNF superfamily member 13 [Source:HGNC Symbol;Acc:HGNC:11928]	protein_coding	17	1	7558292	7561608
	ENSG00000243649	1100.6	0.697794	0.154112	4.52783	5.95913e-06	0.00474306	CFB	complement factor B [Source:HGNC Symbol;Acc:HGNC:1037]	protein_coding	6	1	31945650	31952086
	ENSG00000286299	33.6665	0.690492	0.177727	3.88513	0.000102276	0.0368865		novel transcript, antisense to HDDC2	lncRNA	6	1	125268087	125274828
	ENSG00000188677	328.939	0.689782	0.180449	3.82259	0.000132057	0.043485	PARVB	parvin beta [Source:HGNC Symbol;Acc:HGNC:14653]	protein_coding	22	1	43999211	44172939
	ENSG00000196656	146.012	0.680189	0.180116	3.7764	0.00015911	0.0470842		ribosomal protein S26 (RPS26) pseudogene	transcribed_processed_pseudogene	4	-1	113214046	113217170
	ENSG00000082701	5077.91	0.675658	0.14995	4.50588	6.60978e-06	0.00508557	GSK3B	glycogen synthase kinase 3 beta [Source:HGNC Symbol;Acc:HGNC:4617]	protein_coding	3	-1	119821321	120094994
	ENSG00000141510	1278.7	0.674071	0.111408	6.05047	1.44425e-09	6.66723e-06	TP53	tumor protein p53 [Source:HGNC Symbol;Acc:HGNC:11998]	protein_coding	17	-1	7661779	7687538
	ENSG00000054598	141.702	0.663053	0.175535	3.77733	0.00015852	0.0470842	FOXC1	forkhead box C1 [Source:HGNC Symbol;Acc:HGNC:3800]	protein_coding	6	1	1609915	1613897
	ENSG00000186523	123.545	0.648366	0.16197	4.00299	6.25467e-05	0.0257804	FAM86B1	family with sequence similarity 86 member B1 [Source:HGNC Symbol;Acc:HGNC:28268]	protein_coding	8	-1	12182096	12194133
	ENSG00000259992	15.4246	0.635278	0.141769	4.48107	7.42695e-06	0.00535715		ADAT1 and TMEM231 readthrough transcript	lncRNA	16	-1	75541399	75608445
	ENSG00000103154	812.753	0.608996	0.158722	3.83687	0.000124611	0.043485	NECAB2	N-terminal EF-hand calcium binding protein 2 [Source:HGNC Symbol;Acc:HGNC:23746]	protein_coding	16	1	83968244	84002776
	ENSG00000230910	499.603	0.608596	0.153289	3.97024	7.18005e-05	0.0288686	ADGRB3-DT	ADGRB3 divergent transcript [Source:HGNC Symbol;Acc:HGNC:55774]	lncRNA	6	-1	68627879	68635169
	ENSG00000258708	221.166	0.608575	0.14659	4.15154	3.30249e-05	0.0173246	SLC25A21-AS1	SLC25A21 antisense RNA 1 [Source:HGNC Symbol;Acc:HGNC:44298]	lncRNA	14	1	37171888	37173811
	ENSG00000187595	511.974	0.607306	0.150193	4.04351	5.26558e-05	0.0238873	ZNF385C	zinc finger protein 385C [Source:HGNC Symbol;Acc:HGNC:33722]	protein_coding	17	-1	42025576	42098479
	ENSG00000114735	2180.91	0.598915	0.134915	4.4392	9.02925e-06	0.00631555	HEMK1	HemK methyltransferase family member 1 [Source:HGNC Symbol;Acc:HGNC:24923]	protein_coding	3	1	50569152	50596168
	ENSG00000110321	27663.7	0.592095	0.0942255	6.28381	3.30384e-10	2.54197e-06	EIF4G2	eukaryotic translation initiation factor 4 gamma 2 [Source:HGNC Symbol;Acc:HGNC:3297]	protein_coding	11	-1	10797050	10808940
	ENSG00000107317	6854.38	0.585773	0.145778	4.01826	5.86283e-05	0.024702	PTGDS	prostaglandin D2 synthase [Source:HGNC Symbol;Acc:HGNC:9592]	protein_coding	9	1	136975092	136981742
	ENSG00000084453	236.855	-0.602528	0.156613	-3.84725	0.000119451	0.0424181	SLCO1A2	solute carrier organic anion transporter family member 1A2 [Source:HGNC Symbol;Acc:HGNC:10956]	protein_coding	12	-1	21264600	21419594
	ENSG00000143858	151.921	-0.615332	0.162754	-3.78075	0.000156358	0.0470842	SYT2	synaptotagmin 2 [Source:HGNC Symbol;Acc:HGNC:11510]	protein_coding	1	-1	202590596	202710454
	ENSG00000144810	1756.28	-0.644737	0.168654	-3.82285	0.000131918	0.043485	COL8A1	collagen type VIII alpha 1 chain [Source:HGNC Symbol;Acc:HGNC:2215]	protein_coding	3	1	99638475	99799226
	ENSG00000156265	116.833	-0.652483	0.173469	-3.76138	0.00016898	0.0493721	MAP3K7CL	MAP3K7 C-terminal like [Source:HGNC Symbol;Acc:HGNC:16457]	protein_coding	21	1	29077471	29175889
	ENSG00000171431	350.674	-0.657545	0.168916	-3.89273	9.91229e-05	0.0363167	KRT20	keratin 20 [Source:HGNC Symbol;Acc:HGNC:20412]	protein_coding	17	-1	40875889	40885242
	ENSG00000281000	15.9965	-0.663106	0.143145	-4.63242	3.61418e-06	0.00347593	SNORD3D	small nucleolar RNA, C/D box 3D [Source:HGNC Symbol;Acc:HGNC:33192]	snoRNA	17	-1	19112420	19112636
	ENSG00000198743	12218.9	-0.670789	0.152186	-4.40768	1.04484e-05	0.00709326	SLC5A3	solute carrier family 5 member 3 [Source:HGNC Symbol;Acc:HGNC:11038]	protein_coding	21	1	34073578	34106260
	ENSG00000261888	138.608	-0.673011	0.177695	-3.78744	0.000152206	0.0468429		novel transcript	lncRNA	17	1	83104255	83106910
	ENSG00000198326	132.993	-0.684753	0.179364	-3.81766	0.000134721	0.043485	TMEM239	transmembrane protein 239 [Source:HGNC Symbol;Acc:HGNC:40044]	protein_coding	20	1	2816302	2820284
	ENSG00000138346	419.852	-0.686243	0.144598	-4.74587	2.07615e-06	0.00266231	DNA2	DNA replication helicase/nuclease 2 [Source:HGNC Symbol;Acc:HGNC:2939]	protein_coding	10	-1	68414064	68472121
	ENSG00000137766	185.242	-0.706744	0.17376	-4.06735	4.75498e-05	0.0227425	UNC13C	unc-13 homolog C [Source:HGNC Symbol;Acc:HGNC:23149]	protein_coding	15	1	53978201	54628707
	ENSG00000186792	60.2146	-0.728856	0.180278	-4.04297	5.27794e-05	0.0238873	HYAL3	hyaluronidase 3 [Source:HGNC Symbol;Acc:HGNC:5322]	protein_coding	3	-1	50292831	50299405
	ENSG00000118523	2834.23	-0.741273	0.131027	-5.65739	1.53691e-08	3.94167e-05	CCN2	cellular communication network factor 2 [Source:HGNC Symbol;Acc:HGNC:2500]	protein_coding	6	-1	131948176	131951372
	ENSG00000170365	812.639	-0.742508	0.17395	-4.26852	1.96772e-05	0.0119524	SMAD1	SMAD family member 1 [Source:HGNC Symbol;Acc:HGNC:6767]	protein_coding	4	1	145481194	145559176
	ENSG00000115232	387.058	-0.745902	0.160322	-4.65254	3.27876e-06	0.00344001	ITGA4	integrin subunit alpha 4 [Source:HGNC Symbol;Acc:HGNC:6140]	protein_coding	2	1	181457202	181538940
	ENSG00000170279	195.066	-0.746517	0.160899	-4.63967	3.48969e-06	0.00347593	C7orf33	chromosome 7 open reading frame 33 [Source:HGNC Symbol;Acc:HGNC:21724]	protein_coding	7	1	148590766	148615860
	ENSG00000146094	116.646	-0.768742	0.169122	-4.54549	5.48089e-06	0.00451821	DOK3	docking protein 3 [Source:HGNC Symbol;Acc:HGNC:24583]	protein_coding	5	-1	177501904	177511274
	ENSG00000280422	1153.94	-0.76987	0.165461	-4.65287	3.27339e-06	0.00344001		TEC	TEC	3	-1	51951849	51953902
	ENSG00000279518	115.919	-0.808865	0.163937	-4.93401	8.0559e-07	0.00123964		TEC	TEC	8	-1	134783694	134785879
	ENSG00000278233	548.716	-0.954896	0.181516	-5.26068	1.43526e-07	0.000276072	RNA5-8SN2	RNA, 5.8S ribosomal N2 [Source:HGNC Symbol;Acc:HGNC:53521]	rRNA	21	1	8212572	8212724
